# Supplementary material for: High surface area metal salt templated carbon aerogels via a simple subcritical drying route: preparation and CO2 uptake properties
Source: Royal Society of Chemistry journal article supplement (doi:10.1039/c3ra43420f), 2013-01-01
Supplement: c3ra43420f.pdf [file c3ra43420f.pdf]

*Supporting Information*

**High surface area metal salt templated carbon aerogels via a simple subcritical drying route: Preparation and CO<sub>2</sub> uptake properties**

Eric Masika and Robert Mokaya

*School of Chemistry, University of Nottingham, University Park, NG7 2RD Nottingham, U.K. Fax: +44 (0) 115 951 3562; Tel: +44 (0) 115 846 6174; E-mail: [r.mokaya@nottingham.ac.uk](mailto:r.mokaya@nottingham.ac.uk) (R. Mokaya)*

## Material Synthesis

The following chemicals were used as supplied without any modification; 2,4,6-Triamino-1,3,5-triazine (Melamine), hydrochloric acid and sodium carbonate from Fischer Scientific while 37% Formaldehyde and calcium chloride were obtained from Sigma-Aldrich. The carbon aerogels were synthesized as follows; 4.2 g of melamine and 19.4 g of 37% formaldehyde were added to 15 ml of water under stirring, followed by the addition of 0.44 g (0.007 moles) of 0.1M sodium carbonate solution. The resulting mixture, which had a pH of 8.5 was heated at 40 °C until a clear solution of hexamethylmelamine (MF) was formed. Metal salt templating was via addition of 33.6 g of CaCl<sub>2</sub> to the MF solution to a CaCl<sub>2</sub>/MF ratio of 2. A condensation reaction was then initiated by adjusting the pH of the salt containing MF solution to 4.5 by addition of 1M HCl. The solution was then heated at 60 °C for 1 h, during which a MF resin/calcium chloride composite was formed. The composite was dried and cured at 180 °C for 6 h then carbonised at 700, 800 and 900 °C for 2 h under nitrogen gas flow. The products were washed with water to remove the metal salt template. The washed products (carbon aerogels) were denoted as Ca-CAMF<sub>x</sub> (where x = temperature of carbonisation), i.e., the resultant carbon aerogels carbonised at 700, 800 and 900 °C were designated as Ca-CAMF700, Ca-CAMF800 and Ca-CAMF900 respectively.

Chemical activation of the Ca-CAMF800 aerogel was performed by mixing the carbon with KOH at a carbon/KOH weight ratio of 1:4. The carbon/KOH mixture was ground together to attain a homogeneous sample which was loaded on an alumina boat and placed in a flow-through tube furnace followed by heat-treatment at heating ramp rate of 3 °C/min under nitrogen gas flow to the activation temperature (600 or 800 °C) and held for 1 h. After cooling down under nitrogen flow, the activated templated carbon aerogels were obtained and washed with 2 M HCl under stirring at room temperature to remove any inorganic salts formed during the activation stage, followed by copious deionise water until a neutral pH was attained. Solid materials were obtained by filtration and finally dried in the oven at 120 °C. The obtained templated activated aerogels were denoted as 14AC-CAMF800-x (where x is 6 or 8 corresponding to activation at 600, or 800 °C respectively).

In order to assess the effect of salt templating a set of activated carbon aerogels were prepared from conventional non-metal salt templated melamine-formaldehyde resin (designated as CAMF). The carbons were designated as 12AC-CAMF<sub>x</sub> (where x is the activation temperature of 600, 700, 800 or 900 °C while 12 means carbon:KOH ratio of 1:2).

For porosity analysis, each sample was pre-dried in an oven and then degassed overnight at 200 °C under high vacuum. The textural properties were determined by nitrogen sorption at -196 °C using a Micromeritics ASAP 2020 volumetric sorptometer. The surface area was calculated by using the BET method applied to adsorption data in the relative pressure (P/P<sub>0</sub>) range of 0.06 – 0.22. The total pore volume was determined from the amount of nitrogen adsorbed at P/P<sub>0</sub> = 0.99. The micropore surface area and pore volume were determined via *t*-plot analysis. The pore size distribution was determined via two methods, which were applied to adsorption data; the BJH method and a non-local density functional theory (NLDFT) method.

### CO<sub>2</sub> uptake measurements:

CO<sub>2</sub> uptake was measured using a TA Instruments SDT Q600 analyzer at atmospheric pressure. Prior to uptake measurements, the carbon samples were heated to 250 °C under static nitrogen and then cooled to 25 °C under a flow of nitrogen. The samples were then purged with CO<sub>2</sub> (50 mL min<sup>-1</sup>) for 3 h, and then the CO<sub>2</sub> uptake determined repeatedly at 25 °C. Between measurements, desorption of CO<sub>2</sub> was undertaken by heating the sample to 250 °C under nitrogen gas flowing at the rate of 100 mL min<sup>-1</sup>.

**Table S1.** Textural properties and CO<sub>2</sub> uptake of CaCl<sub>2</sub>-templated carbon aerogel Ca-CAMF800 before and after activation (14AC-Ca-CAMF800-X, where X is activation temperature; 6 or 8 for 600 or 800 °C respectively) at KOH/carbon ratio = 4.

| Sample            | Surface area (m <sup>2</sup> /g) <sup>a</sup> | Pore volume (cm <sup>3</sup> /g) <sup>b</sup> | Pore size (Å) <sup>c</sup> | CO <sub>2</sub> uptake (mmol/g) <sup>d</sup> |
|-------------------|-----------------------------------------------|-----------------------------------------------|----------------------------|----------------------------------------------|
| Ca-CAMF800        | 1090 (611)                                    | 1.37 (0.28)                                   | 1.2/3/9                    | 2.1                                          |
| 14AC-Ca-CAMF800-6 | 1504 (1272)                                   | 0.83 (0.60)                                   | 1.2/2.7                    | 2.5                                          |
| 14AC-Ca-CAMF800-8 | 3343 (803)                                    | 2.65 (0.36)                                   | 1.2/3.1                    | 2.6                                          |

The values in the parentheses refer to; <sup>a</sup>micropore surface area, <sup>b</sup>micropore volume. <sup>c</sup>Maxima of pore size obtained from PSD curves. <sup>d</sup>CO<sub>2</sub> uptake at 298 K and 1 bar.

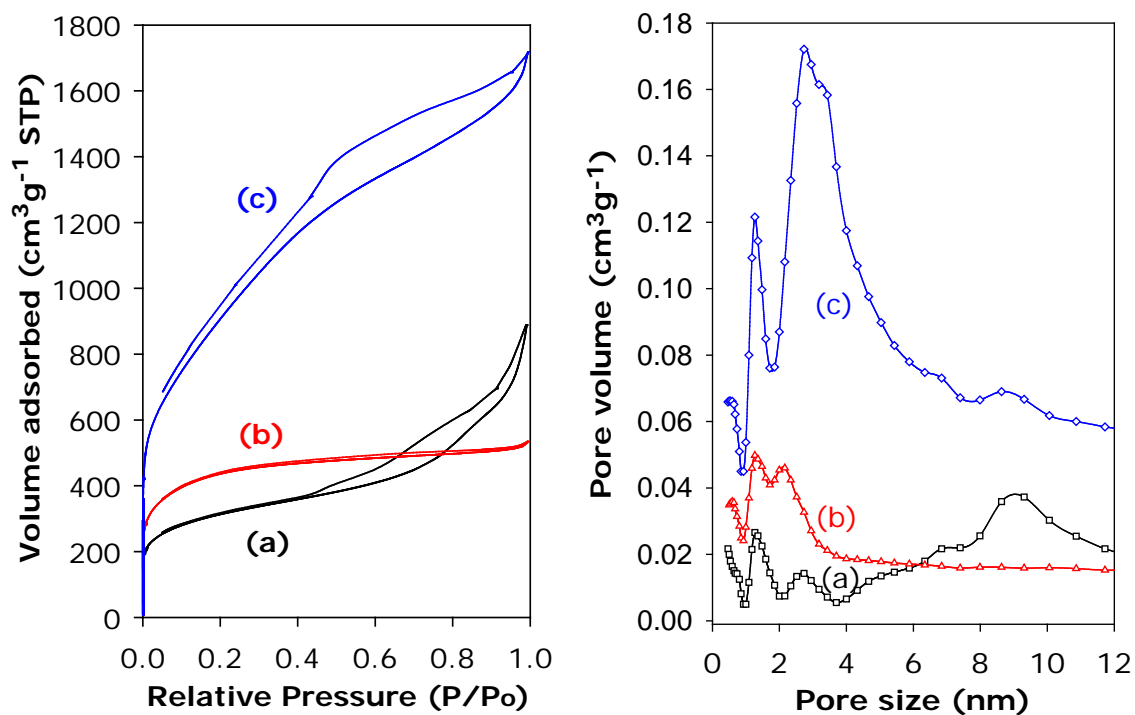

**Fig. S1.** Nitrogen sorption isotherms (left panel) and pore size distribution curves (right panel) for (a) CaCl<sub>2</sub>-templated carbon aerogel (Ca-CAMF800) and after activation (14AC-Ca-CAMF800X, where X is activation temperature; 6 or 8 for 600 or 800 °C respectively) at KOH/carbon ratio = 4; (b) 14AC-Ca-CAMF800-6 and (c) 14AC-Ca-CAMF800-8.

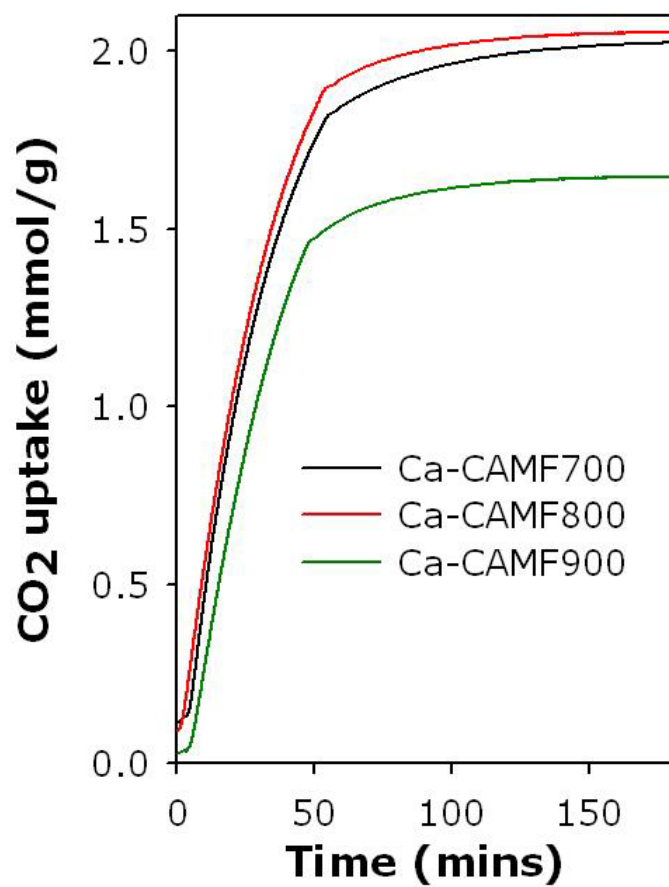

**Fig. S2.** CO<sub>2</sub> uptake as a function of time under ambient conditions for Ca-CAMF<sub>x</sub> samples carbonised at 700, 800 or 900 °C. Uptake was from flowing CO<sub>2</sub>.

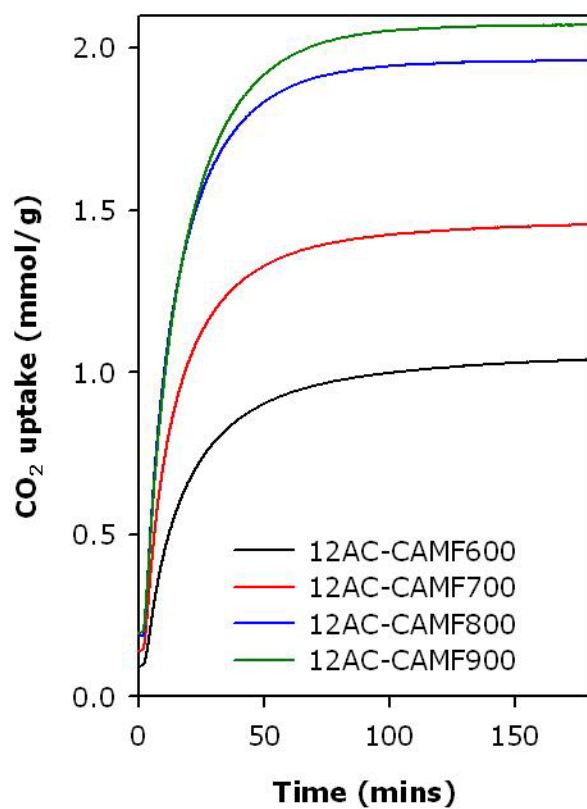

**Fig. S3.** CO<sub>2</sub> uptake under ambient conditions (25 °C and 1 bar) for activated non-templated carbon aerogels (12AC-CAMFX, where X is activation temperature, and at KOH/carbon ratio = 2).
